# Supplementary material for: Genetic Diversity Analysis of Olive Germplasm (Olea europaea L.) With Genotyping-by-Sequencing Technology
Source: Front Genet. 2019 Aug 21;10:755. doi: 10.3389/fgene.2019.00755 (PMC6712157; doi:10.3389/fgene.2019.00755)
Supplement: Table S1 — The main parameters for sequences alignment and SNP calling. [file Table_1.xlsx]

## Sheet: Sheet1
Supplementary Table S1 The main parameters for sequences alignment and SNP calling.
Purpose	Software	Options description
Sequences alignment	SOAP2 (Hurgobin, 2016)	-p, number of processors to use, [1]
		-m, minimal insert size allowed, [400]
		-x , maximal insert size allowed, [600]
		-s , minimal alignment length (for soft clip), [255] bp
		-l , align the initial n bps as a seed [256] means whole length of read
		-v , maximum number of mismatches allowed on a read, [5] bp
		-t , output reads id instead reads name, [none]
SNP calling	SOAPsnp (Li et al., 2008)	-u , enable rank sum test (that check whether the two allele of a possible HET call have same sequencing quality) to give HET further penalty for better accuracy
		-t , set transition/transversion ratio to 2:1 in prior probability
		-L , maximum length of read, [45]
		-Q , maximum FASTQ quality score, [40]
